# Supplementary material
Source: Elsevier journal article supplement (https://www.sciencedirect.com/science/article/pii/S2341287922001399)
Supplement: mmc1 [file S2341287922001399:mmc1.docx]

**MATERIAL Y MÉTODOS**

Se constituyó un grupo de expertos propuestos por la Asociación Española de Pediatría (AEP) y la Sociedad Española de Inmunología Clínica y Alergología y Asma Pediátrica (SEICAP), Sociedad Española de Gastroenterología, Hepatología y Nutrición Pediátrica (SEGHNP) y Sociedad Española de Neonatología (SENEO)..  Se consensuó la siguiente pregunta de investigación estructurada mediante una metodología PICO (13) (*Patient, Intervention, Comparison, Outcome*): En lactantes a término menores de una semana de vida con LM que precisan suplementación con fórmula, ¿el uso de FEH o fórmulas exentas de PLV disminuye el riesgo de desarrollar APLV?

Se realizó una revisión bibliográfica en las bases de datos: PubMed de los últimos 10 años (2011-2021) restringido a los idiomas inglés, francés y español. Se usaron las siguientes palabras clave: *cow´s milk, allergy, prevention, guidelines, hydrolysate*. Tras revisar título y resumen, se seleccionaron aquellos artículos correspondientes a revisiones sistemáticas, ensayos clínicos con grupo control y estudios observacionales. Se excluyeron estudios que no incluían en la población estudiada a recién nacidos con menos de una semana de vida.

Se seleccionaron 72 estudios, de los cuales 66 fueron rechazados por no cumplir los criterios de inclusión y/o de exclusión. Se incluyeron en la revisión 6 documentos: 3 ensayos clínicos y 3 revisiones sistemáticas, dos de ellas con meta-análisis.

Tras el análisis de la literatura, el autor principal elaboró una recomendación final que fue sometida a votación entre los participantes en la elaboración del consenso.
